# Supplementary material for: MiRNA-199a-3p Regulates C2C12 Myoblast Differentiation through IGF-1/AKT/mTOR Signal Pathway
Source: Int J Mol Sci. 2013 Dec 27;15(1):296–308. doi: 10.3390/ijms15010296 (PMC3907811; doi:10.3390/ijms15010296)
Supplement: Supplementary file 1 [file ijms-15-00296-s001.pdf]

## Supplementary Information

**Table S1.** The Sequence of Negative Control for miRNA mimic and inhibitor.

| Name                    | Sequence                    |
|-------------------------|-----------------------------|
| NC(5' to 3')            | UUC UUC GAA CGU GUC ACG UTT |
| (Control for mimics)    | ACG UGA CAC GUU CGG AGA ATT |
| NC(5' to 3')            | CAG UAC UUU UGU GUA GUA CAA |
| (Control for inhibitor) |                             |

**Table S2.** Primer sequences and parameters of Myoblast differentiation marker gene for real-time PCR.

| Gene           | Primer sequence (5' to 3')                                   | Accession No. | $T_m/^{\circ}\text{C}$ |
|----------------|--------------------------------------------------------------|---------------|------------------------|
| <i>Myf5</i>    | F: GGACCAGTTTGAGCCAAGAG<br>R: CGAAAGCTTGGTTGACCTTC           | NM_008656     | 55                     |
| <i>MyoD</i>    | F: AGTGAATGAGGCCTTCGAGA<br>R: GCATCTGAGTCGCCACTGTA           | NM_010866     | 60                     |
| <i>MyoG</i>    | F: CAATGCACTGGAGTTCGGT<br>R: CTGGGAAGGCAACAGACAT             | NM_031189     | 60                     |
| <i>MyHC</i>    | F: CGCAAGAATGTTCTCAGGCT<br>R: GCCAGGTTGACATTGGATTG           | NM_030679     | 60                     |
| <i>MURF1</i>   | R: GCTGGTGGAAAACATCATTGACATC<br>F: GCTGGTGGAAAACATCATTGACATC | NM_001039048  | 59                     |
| <i>Atrogin</i> | R: CTGAATAGCATCCAGATCAGCAGG<br>F: TTGATAAAGTCTTGAGGGGAAAGTG  | NM_026346     | 57                     |

**Table S3.** Primer sequences and parameters of miR-199a-3p target genes for real-time PCR.

| Gene           | Primer sequence (5' to 3')                           | Accession No. | $T_m/^{\circ}\text{C}$ |
|----------------|------------------------------------------------------|---------------|------------------------|
| <i>IGF-1</i>   | F: AGGCATTGTGGATGAGTGTT<br>R: TCCTTTGCAGCTTCGTTT     | NM_010512     | 58                     |
| <i>PIK3r1</i>  | F: CTGAGATTGCTTCGTGAC<br>R: CTTATCCCATGGCTATGA       | NM_001077     | 61                     |
| <i>mTOR</i>    | F: TCCGAGAGATGAGTCAAGAGG<br>R: CACCTTCCACTCCTATGAGGC | NM_020009     | 61                     |
| <i>RKS6KA6</i> | F: AACGGTTATGCGGGAGC<br>R: AACTGTGCGGGATCTGC         | NM_025949     | 60                     |
| <i>GAPDH</i>   | F: GGCAAGTTCAACGGCACAG<br>R: CGCCAGTAGACTCCACGACAT   | NC_005103     | 60                     |

**Table S4.** Primer sequences used for cloning 3' UTR of miR-199a-3p target genes.

| Gene           | Primer sequence (5' to 3')                                                    | Length | Position (NCBI) |
|----------------|-------------------------------------------------------------------------------|--------|-----------------|
| <i>IGF-1</i>   | F: CCGCTCGAGCTGTGGGTGGGTGAGTAC<br>R: ATTTGCGGCCGCATGCTTTGAATGGGAATG           | 691    | 4851-5542       |
| <i>PIK3r1</i>  | F: CCGCTCGAGGGTTGACTCTGGGCTTTGC<br>R: ATTTGCGGCCGCATGGCTATGATCACTCTGGT        | 681    | 4046-4727       |
| <i>mTOR</i>    | F: CCGCTCGAGAAACCACGTCGTCTCCTC<br>R: ATTTGCGGCCGCAGCATATCCCTCCCTCAC           | 625    | 7783-8408       |
| <i>RKS6KA6</i> | F: CCGCTCGAGCTACCTTGAATCCTATGGCG<br>R: ATTTGCGGCCGCGACAAAATACTACACCAAGACTAAAT | 660    | 3682-4342       |

Underlined symbols are the Restriction Enzyme cutting sites.

© 2013 by the authors; licensee MDPI, Basel, Switzerland. This article is an open access article distributed under the terms and conditions of the Creative Commons Attribution license (<http://creativecommons.org/licenses/by/3.0/>).
